# Supplementary material for: Zirconium-doped porous magadiite heterostructures upon 2D intragallery in situ hydrolysis–condensation–polymerization strategy for liquid-phase benzoylation
Source: Royal Society of Chemistry journal article supplement (doi:10.1039/c5ra10911f), 2015-01-01
Supplement: c5ra10911f1.pdf [file c5ra10911f1.pdf]

## Supporting Information

### **Zirconium-doped porous magadiite heterostructures upon 2D intragallery in situ hydrolysis–condensation–polymerization strategy for liquid-phase benzoylation**

Yuewen Ma, Huan Sun, Qi Sun, Hui Zhang\*

\*Correspondence should be addressed to Hui Zhang.

Email: huizhang67@gst21.com

Tel.: +8610-6442 5872

Fax: +8610-6442 5385

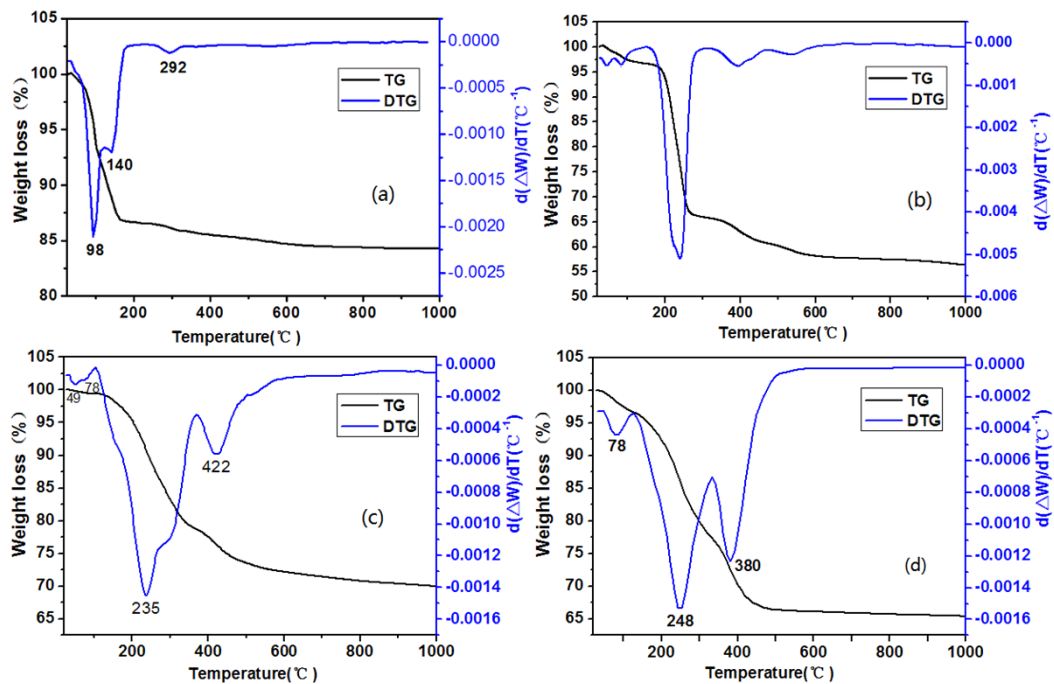

**Fig. S1** TG analysis of the magadiite (a), QM (b), QOTM (c) and QOTM-0.1Zr (d).

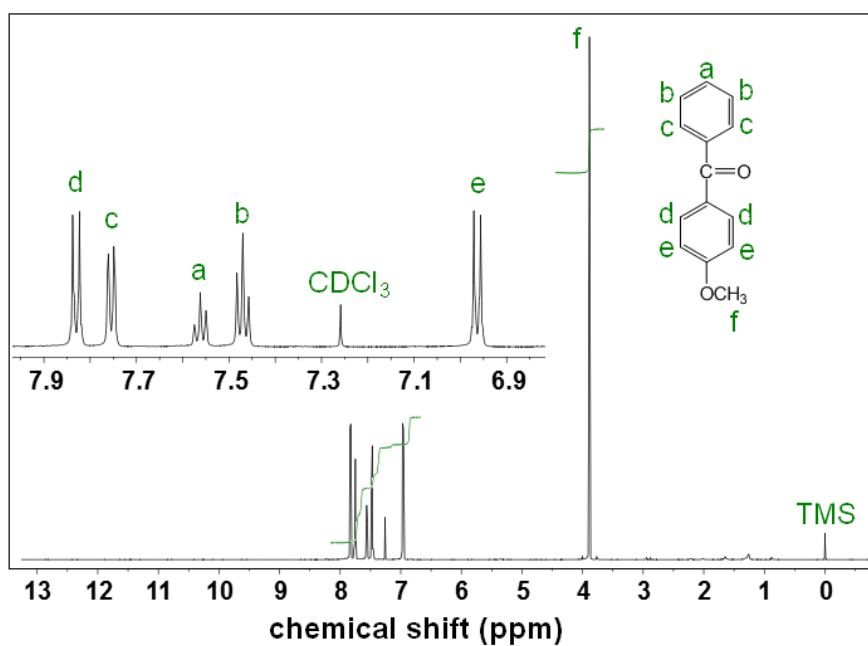

**Fig. S2** <sup>1</sup>H NMR of the product 4-MBP.

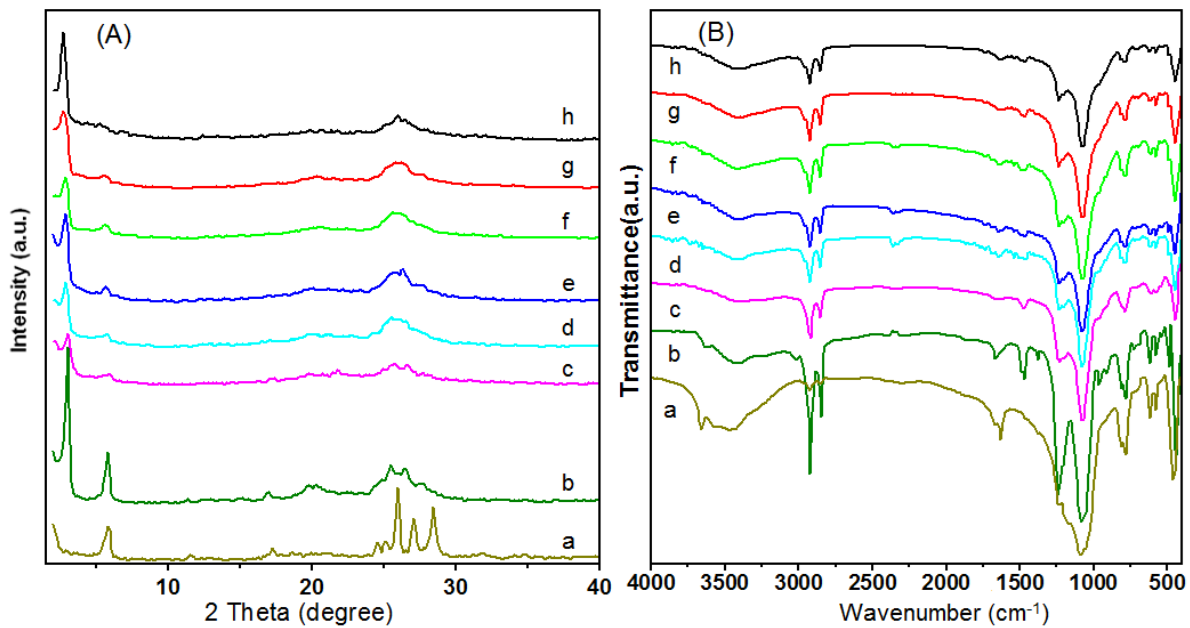

**Fig. S3** XRD (A) and IR (B) spectra of magadiite (a), OM (b), and precursors QOTM (c) and QOTM- $x$ Zr (d-h:  $x=0.0125-0.2$ ).

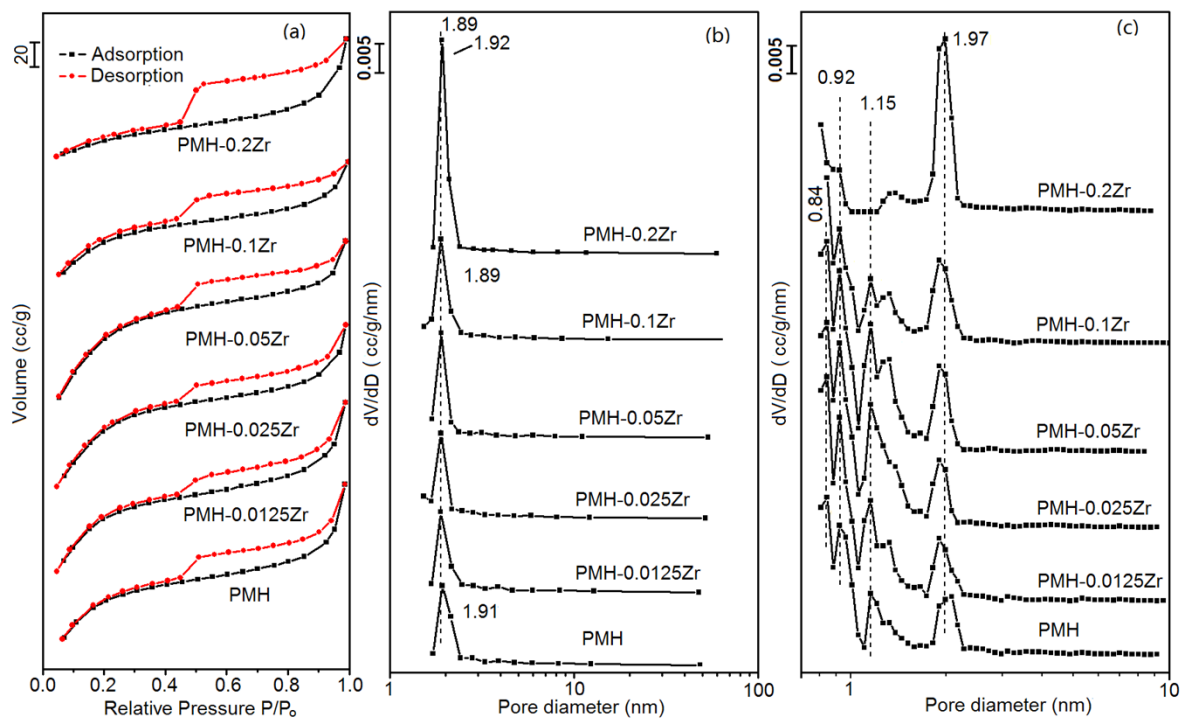

**Fig. S4** The  $N_2$  adsorption-desorption isotherms (a) and pore size distribution curves based on BJH (b) and DFT (c) of PMH and PMH- $x$ Zr catalysts.

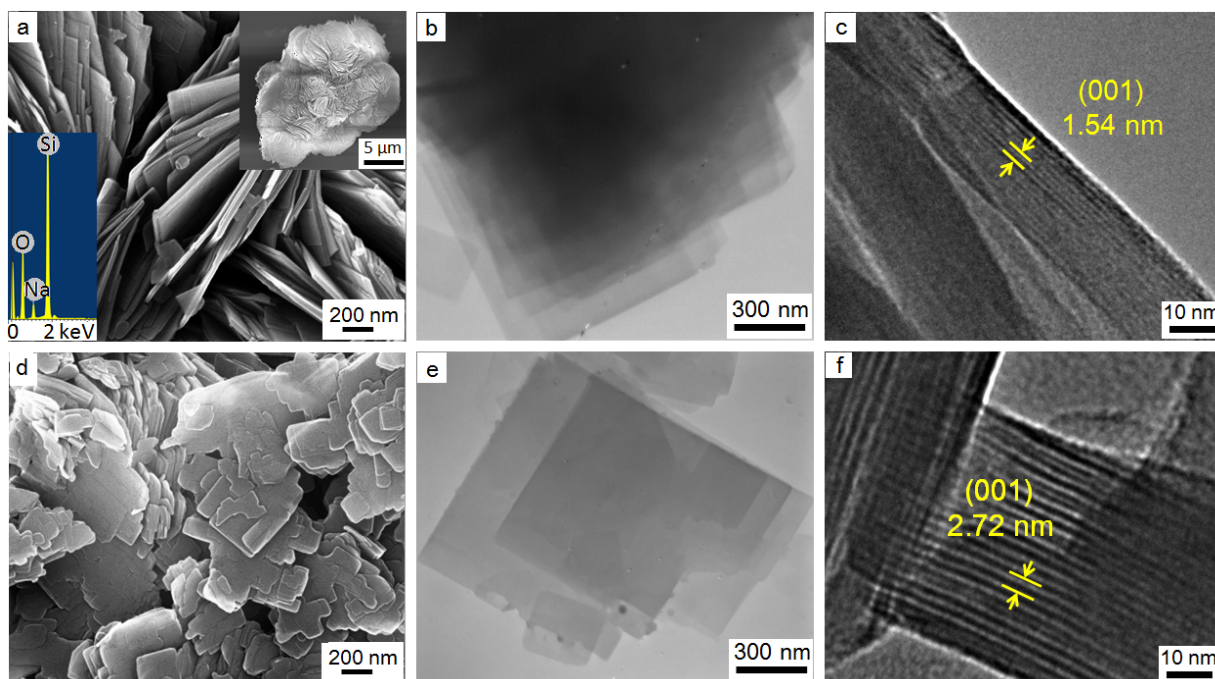

**Fig. S5** SEM/EDX, TEM and HRTEM images of Na-magadiite (a, b, c) and QM (d, e, f).

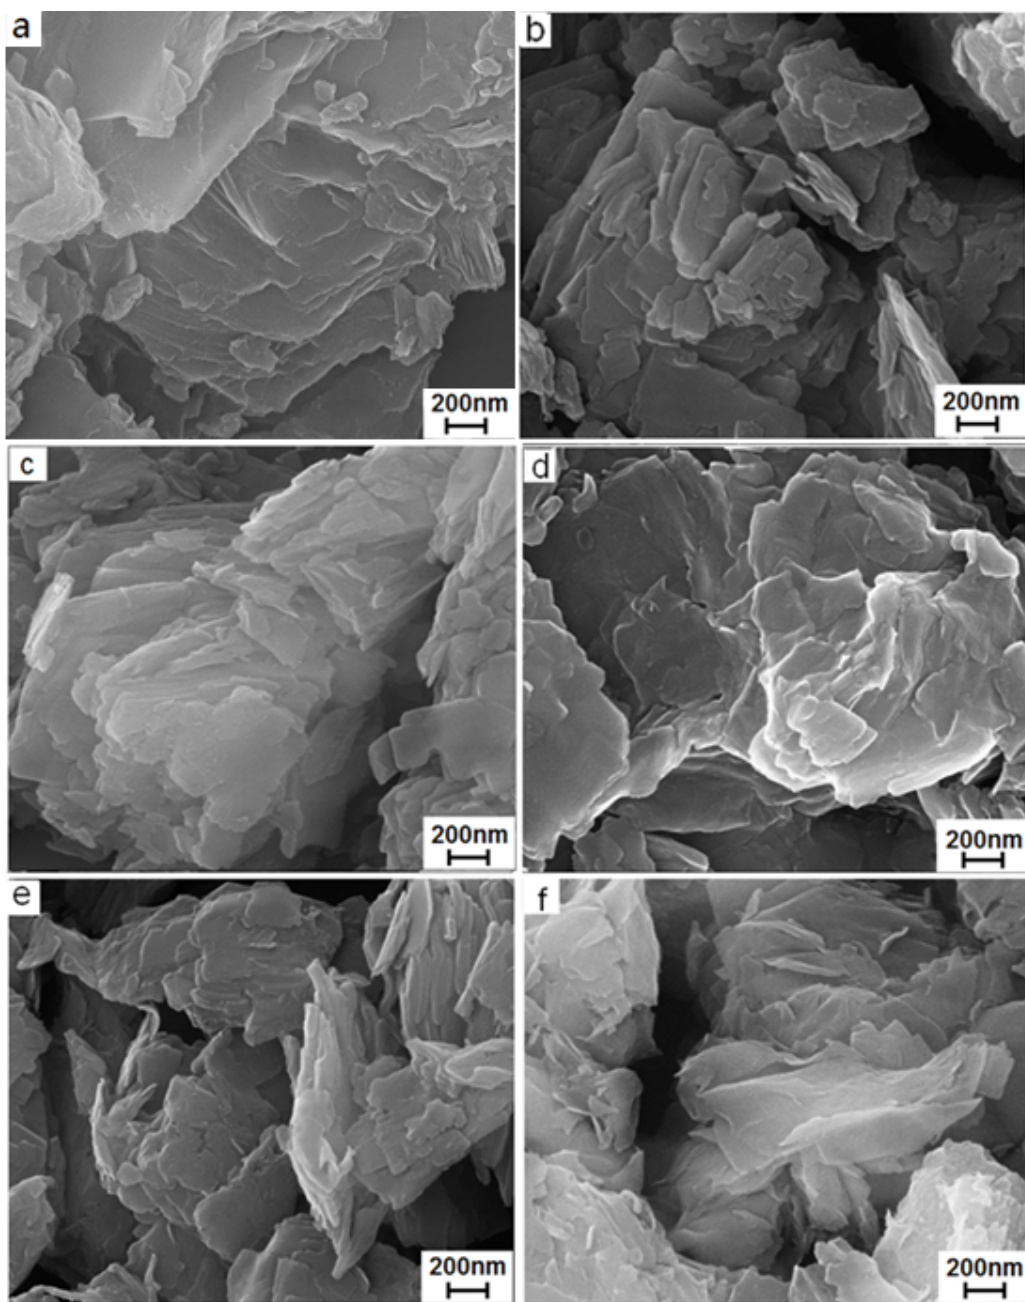

**Fig. S6** SEM images of the precursors QOTM (a) and QOTM-xZr(b-f) (from b to f,  $x = 0.0125, 0.025, 0.05, 0.1, 0.2$ ).

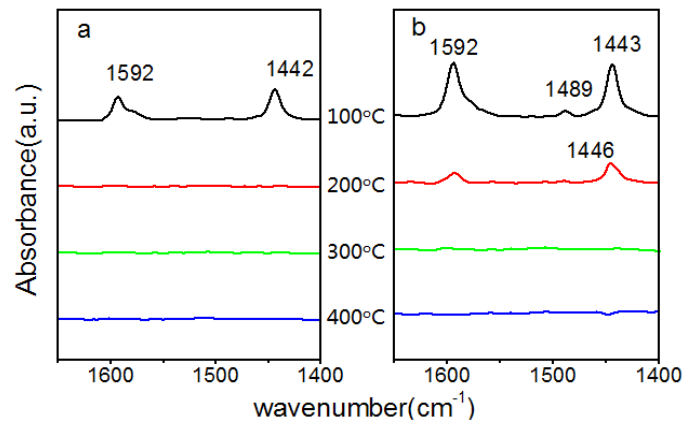

**Fig. S7** In situ FTIR spectra for PMH (a) and PMH-0.0125Zr (b) after pyridine adsorption and evacuation at elevated temperatures.

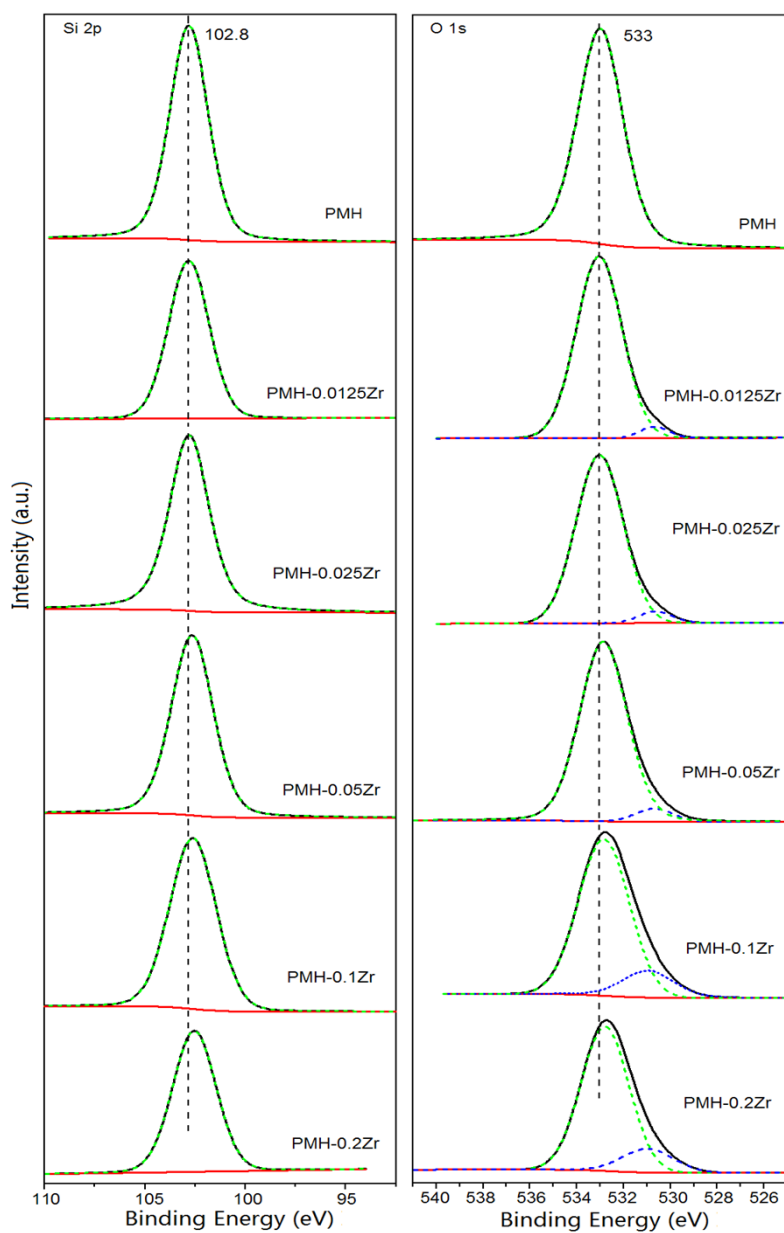

**Fig. S8** Si 2p and O 1s XPS of PMH and PMH-xZr catalysts.

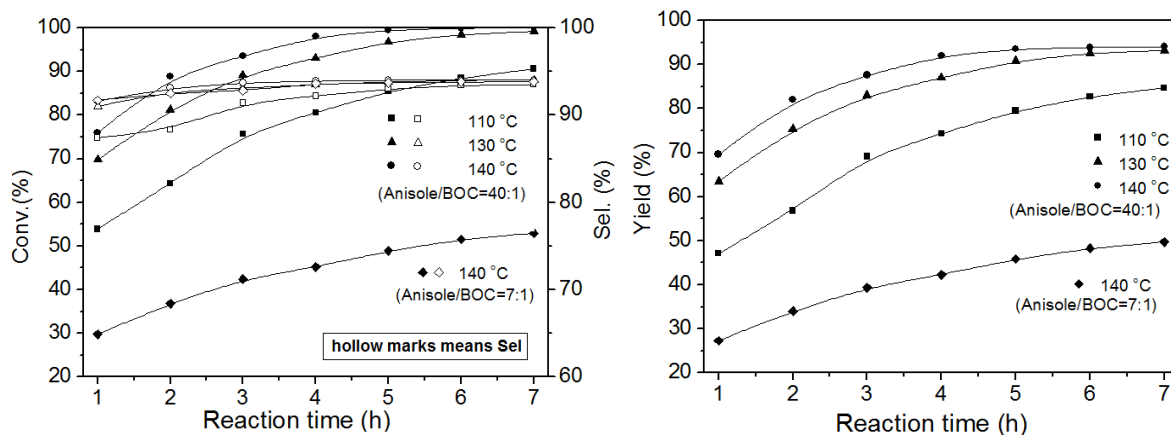

**Fig. S9** Effect of reaction temperature, time and anisole/BOC ratio on the benzylation activity of anisole with BOC over PMH-0.025Zr. Reaction conditions: anisole (108 mmol)/BOC (2.65 mmol) = 40:1 or, anisole (108 mmol): BOC (15.88 mmol) = 7:1,  $W_{\text{cat.}} = 0.2$  g, *n*-tetradecane 0.1 g (GC internal standard).

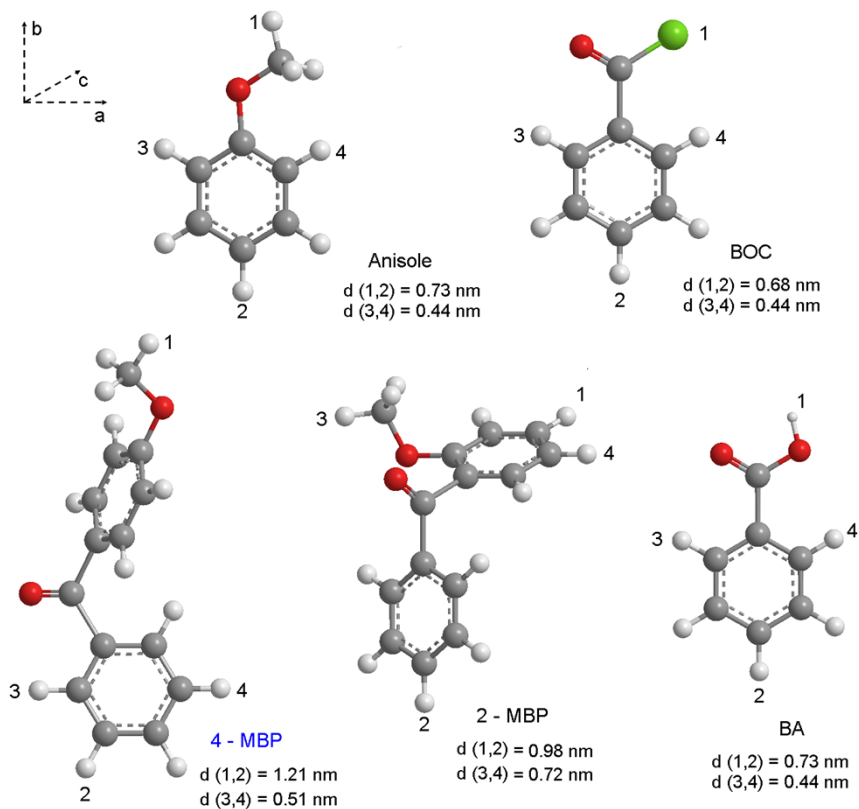

**Fig. S10** Three-dimensional reactants and products with corresponding interatomic distances.

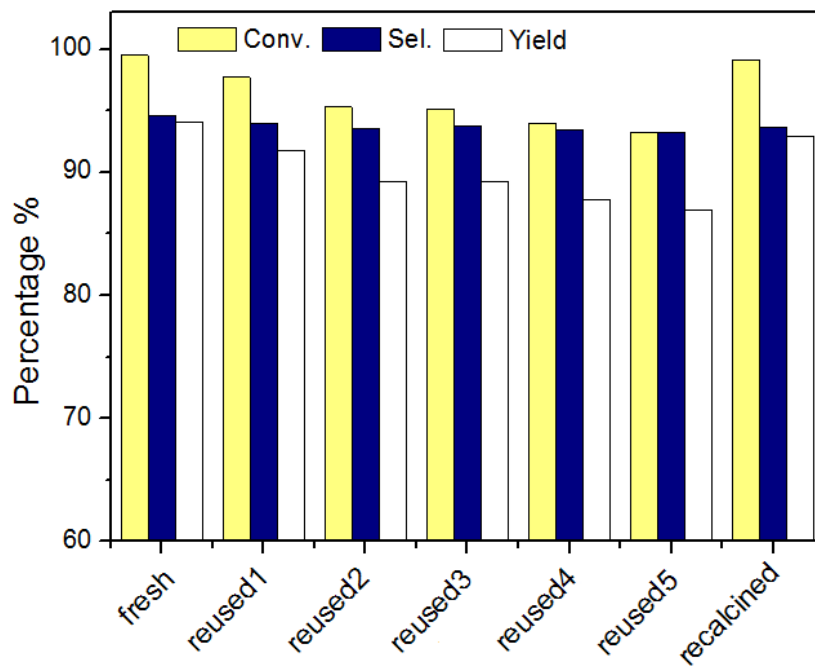

**Fig. S11** Recyclability of PMH-0.1Zr for the benzoylation of anisole with BOC. Reaction conditions:

anisole 108 mmol, BOC 2.65 mmol,  $W_{\text{cat}}$ . 0.2 g, *n*-tetradecane 0.1 g, 140 °C, 3 h.

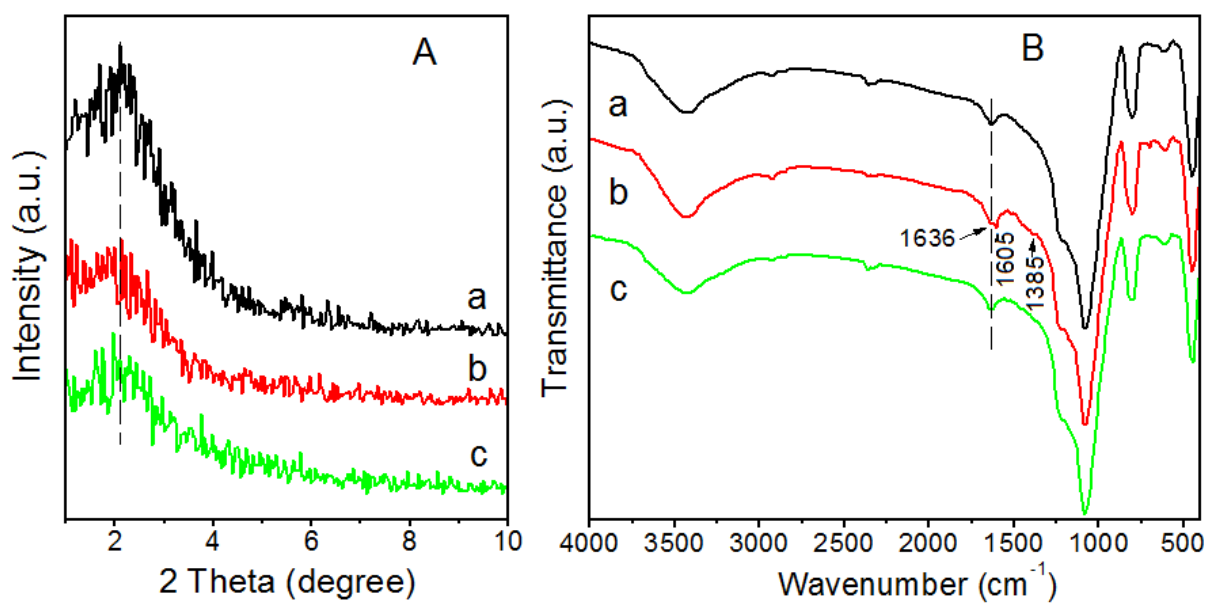

**Fig. S12** XRD patterns (A) and FTIR spectra (B) of PMH-0.1Zr (a), PMH-0.1Zr-reused5 (b) and PMH-0.1Zr-recalculated (c).



**Table S1** Chemical compositions of synthetic magadiite, QM, PMH and PMH-xZr samples.

| Samples      | wt.% <sup>a</sup> |                  |                  |                               | Molecular formula <sup>c</sup>                                                                                           | Feeding Zr/Si | Bulk Zr/Si <sup>d</sup> | Gallery Zr/Si <sup>e</sup> |
|--------------|-------------------|------------------|------------------|-------------------------------|--------------------------------------------------------------------------------------------------------------------------|---------------|-------------------------|----------------------------|
|              | Na <sub>2</sub> O | SiO <sub>2</sub> | ZrO <sub>2</sub> | H <sub>2</sub> O <sup>b</sup> |                                                                                                                          |               |                         |                            |
| Na-magadiite | 5.6               | 78.9             | -                | 15.5                          | Na <sub>1.9</sub> Si <sub>14</sub> O <sub>29</sub> ·9.2H <sub>2</sub> O                                                  | -             | -                       | -                          |
| QM           | -                 | 56.9             | -                | 2.9                           | (C <sub>19</sub> H <sub>43</sub> N) <sub>2.1</sub> Si <sub>14</sub> O <sub>29</sub> ·2.38H <sub>2</sub> O                | -             | -                       | -                          |
| PMH          | -                 | 99.3             | -                | -                             | (SiO <sub>2</sub> ) <sub>28.56</sub> H <sub>2</sub> Si <sub>14</sub> O <sub>29</sub>                                     | -             | -                       | -                          |
| PMH-0.0125Zr | -                 | 97.1             | 2.5              | -                             | (SiO <sub>2</sub> ) <sub>27.61</sub> (ZrO <sub>2</sub> ) <sub>0.52</sub> H <sub>2</sub> Si <sub>14</sub> O <sub>29</sub> | 0.0125        | 0.013                   | 0.017                      |
| PMH-0.025Zr  | -                 | 95.1             | 4.1              | -                             | (SiO <sub>2</sub> ) <sub>21.66</sub> (ZrO <sub>2</sub> ) <sub>0.75</sub> H <sub>2</sub> Si <sub>14</sub> O <sub>29</sub> | 0.025         | 0.021                   | 0.035                      |
| PMH-0.05Zr   | -                 | 92.0             | 7.2              | -                             | (SiO <sub>2</sub> ) <sub>20.50</sub> (ZrO <sub>2</sub> ) <sub>1.31</sub> H <sub>2</sub> Si <sub>14</sub> O <sub>29</sub> | 0.05          | 0.038                   | 0.064                      |
| PMH-0.1Zr    | -                 | 88.8             | 10.1             | -                             | (SiO <sub>2</sub> ) <sub>10.22</sub> (ZrO <sub>2</sub> ) <sub>1.34</sub> H <sub>2</sub> Si <sub>14</sub> O <sub>29</sub> | 0.1           | 0.056                   | 0.131                      |
| PMH-0.2Zr    | -                 | 76.1             | 20.2             | -                             | -                                                                                                                        | 0.2           | 0.130                   | -                          |

<sup>a</sup> Based on EDS results. <sup>b</sup> Based on TG results. <sup>c</sup> Molecular formulae of porous clay heterostructures were calculated based on EDS and TG results, assuming that the transformation into porous clay heterostructures would not change the original layer structure of parent clay according to previous work (M. Polverejan, Y. Liu, T.J. Pinnavaia, *Chem. Mater.* 2002, **14**, 22831; Q. Sun, C. Zhang, H. Sun, H. Zhang, *Ind. Eng. Chem. Res.*, 2014, **53**, 12224), such as for QM, the empirical formula was estimated upon the empirical formula of magadiite, assuming that the amount of Na<sup>+</sup> ions exchanged for CTMA<sup>+</sup> corresponds to cation exchange capacity of clay, and the obtained amount of interlayer C<sub>19</sub>H<sub>42</sub>N<sup>+</sup> is in agreement with the TG result of 40.1 wt.%. <sup>d</sup> Bulk Zr/Si = [total Zr]/[total Si]. <sup>e</sup> Gallery Zr/Si = [total Zr]/[gallery Si].

**Table S2** Deconvolution of <sup>29</sup>Si MAS NMR spectra of the catalysts: chemical shift values, relative portions (%) and (Q<sup>2</sup>+Q<sup>3</sup>)/Q<sup>4</sup> ratios.

| Sample       | Chemical shift, ppm             |                                 |                                 | (Q <sup>2</sup> +Q <sup>3</sup> )/Q <sup>4</sup> Ratio |
|--------------|---------------------------------|---------------------------------|---------------------------------|--------------------------------------------------------|
|              | Q <sup>2</sup> (%) <sup>a</sup> | Q <sup>3</sup> (%) <sup>a</sup> | Q <sup>4</sup> (%) <sup>a</sup> |                                                        |
| PMH          | -92.3 (3.3)                     | -102.0 (21.2)                   | -111.1 (75.5)                   | 0.32                                                   |
| PMH-0.0125Zr | -92.4 (5.3)                     | -103.1 (23.4)                   | -111.4 (71.3)                   | 0.40                                                   |
| PMH-0.05Zr   | -92.6 (5.6)                     | -101.7 (24.5)                   | -110.8 (69.9)                   | 0.43                                                   |
| PMH-0.1Zr    | -91.6 (3.9)                     | -102.5 (29.0)                   | -111.2 (67.1)                   | 0.49                                                   |
| PMH-0.2Zr    | -91.4 (5.8)                     | -101.7 (19.0)                   | -111.4 (75.2)                   | 0.33                                                   |

<sup>a</sup> Relative portion in the parentheses.

**Table S3** The XPS data of PMH and PMH-*x*Zr catalysts.

| Catalysts    | O 1s    |         | $A_{\text{Si-O-Si}}/A_{\text{Si-O-Zr}}^a$ | Zr 3d             |                   | $A_{3d_{5/2}}/A_{3d_{3/2}}$ | Si 2p  | Si/Zr<br>ratio <sup>b</sup> | Zr/Si ratio <sup>b</sup> |
|--------------|---------|---------|-------------------------------------------|-------------------|-------------------|-----------------------------|--------|-----------------------------|--------------------------|
|              | Si-O-Si | Si-O-Zr |                                           | 3d <sub>3/2</sub> | 3d <sub>5/2</sub> |                             |        |                             |                          |
| PMH          | 532.99  | -       | -                                         | -                 | -                 | -                           | 102.83 | -                           | -                        |
| PMH-0.0125Zr | 533.04  | 530.68  | 25                                        | 185.83            | 183.45            | 2.9                         | 102.84 | 81.5 (76.9)                 | 0.0123 (0.013)           |
| PMH-0.025Zr  | 533.03  | 530.63  | 21                                        | 185.96            | 183.56            | 1.9                         | 102.84 | 86.4 (47.6)                 | 0.0116 (0.021)           |
| PMH-0.05Zr   | 532.87  | 530.67  | 18                                        | 185.57            | 183.27            | 3.0                         | 102.68 | 22.0 (26.3)                 | 0.045 (0.038)            |
| PMH-0.1Zr    | 532.76  | 530.76  | 5.3                                       | 185.72            | 183.47            | 2.9                         | 102.61 | 12.9 (17.9)                 | 0.077 (0.056)            |
| PMH-0.2Zr    | 532.79  | 530.97  | 5.6                                       | 185.66            | 183.32            | 1.9                         | 102.54 | 5.6 (7.7)                   | 0.179 (0.130)            |

<sup>a</sup> Peak area ratio of two components corresponding to Si-O-Si and Si-O-Zr upon deconvoluted spectra. <sup>b</sup> Data in parentheses from EDX..
